# Supplementary material for: Multifunction gelatin/chitosan composite microspheres with ROS-scavenging and antibacterial activities for improving the microenvironment of chronic wounds
Source: Royal Society of Chemistry journal article supplement (doi:10.1039/d1nj00645b), 2021-01-01
Supplement: d1nj00645b1.pdf [file d1nj00645b1.pdf]

## Supporting information

### **Multifunction Gelatin/Chitosan Composite Microspheres with ROS–scavenging and Antibacterial Activities for Improving the Microenvironment of Chronic Wound Healing**

Yu Chen<sup>a,b,c</sup>, Weipeng Lu<sup>a,c\*</sup>, Yanchuan Guo<sup>a,b,c\*</sup>, Yuntao, Xie<sup>c</sup>, Yi Zhu<sup>c</sup> and  
Yeping Song<sup>c</sup>

<sup>a</sup> Key Laboratory of Photochemical Conversion and Optoelectronic Material,  
Technical Institute of Physics and Chemistry, Chinese Academy of Sciences, Beijing  
100190, China

<sup>b</sup> University of Chinese Academy of Sciences, Beijing 100049, China

<sup>c</sup> Hangzhou Research Institute of Technical Institute of Physics and Chemistry,  
Chinese Academy of Sciences, Hangzhou 310018, China

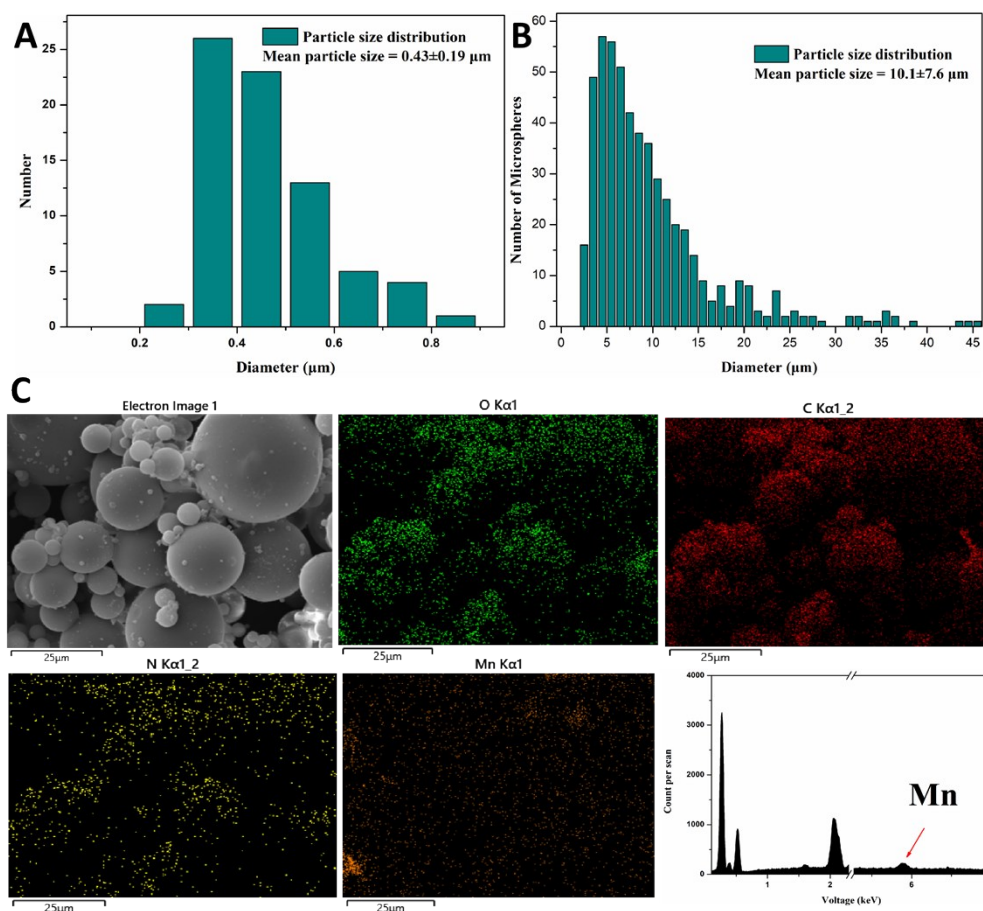

**Fig. S1.** (A) Size distribution of MnO<sub>2</sub> nanosheets measured by TEM images. (B) Size distribution of GCPM measured by SEM images. (C) EDX mapping of GCPM.

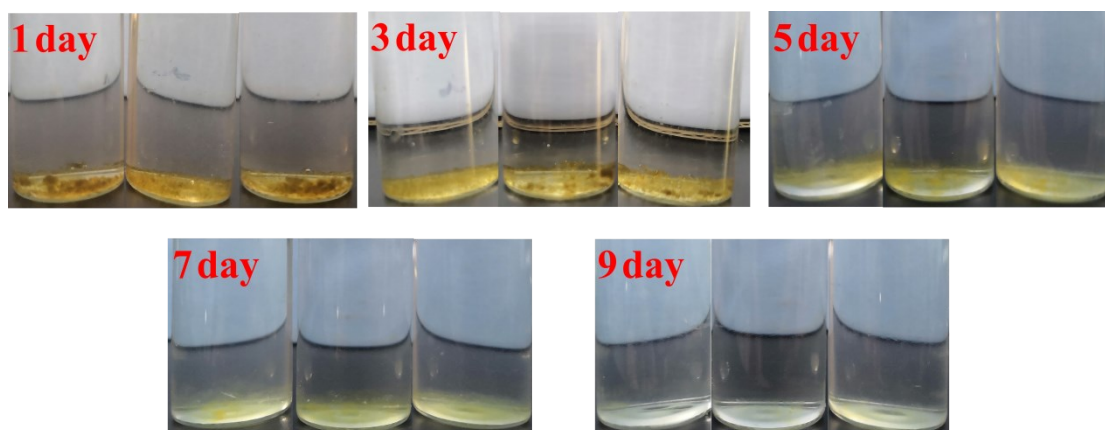

**Fig S2.** Degradation process diagram of GCPM in phosphate buffer saline (PBS) at 37 °C

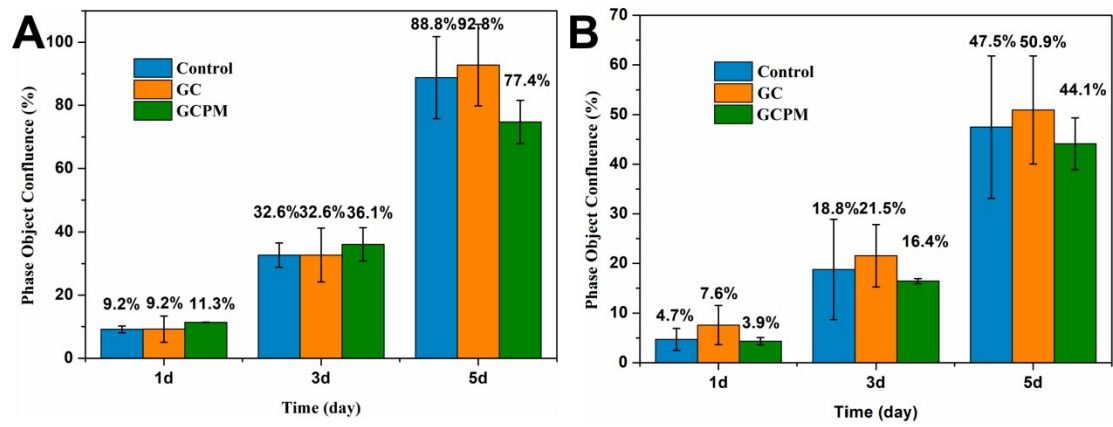

**Fig. S3.** Percent cell viability of L929 (A) MRC-5 (B) cells following treatment with GC and GCPM for 5 days.

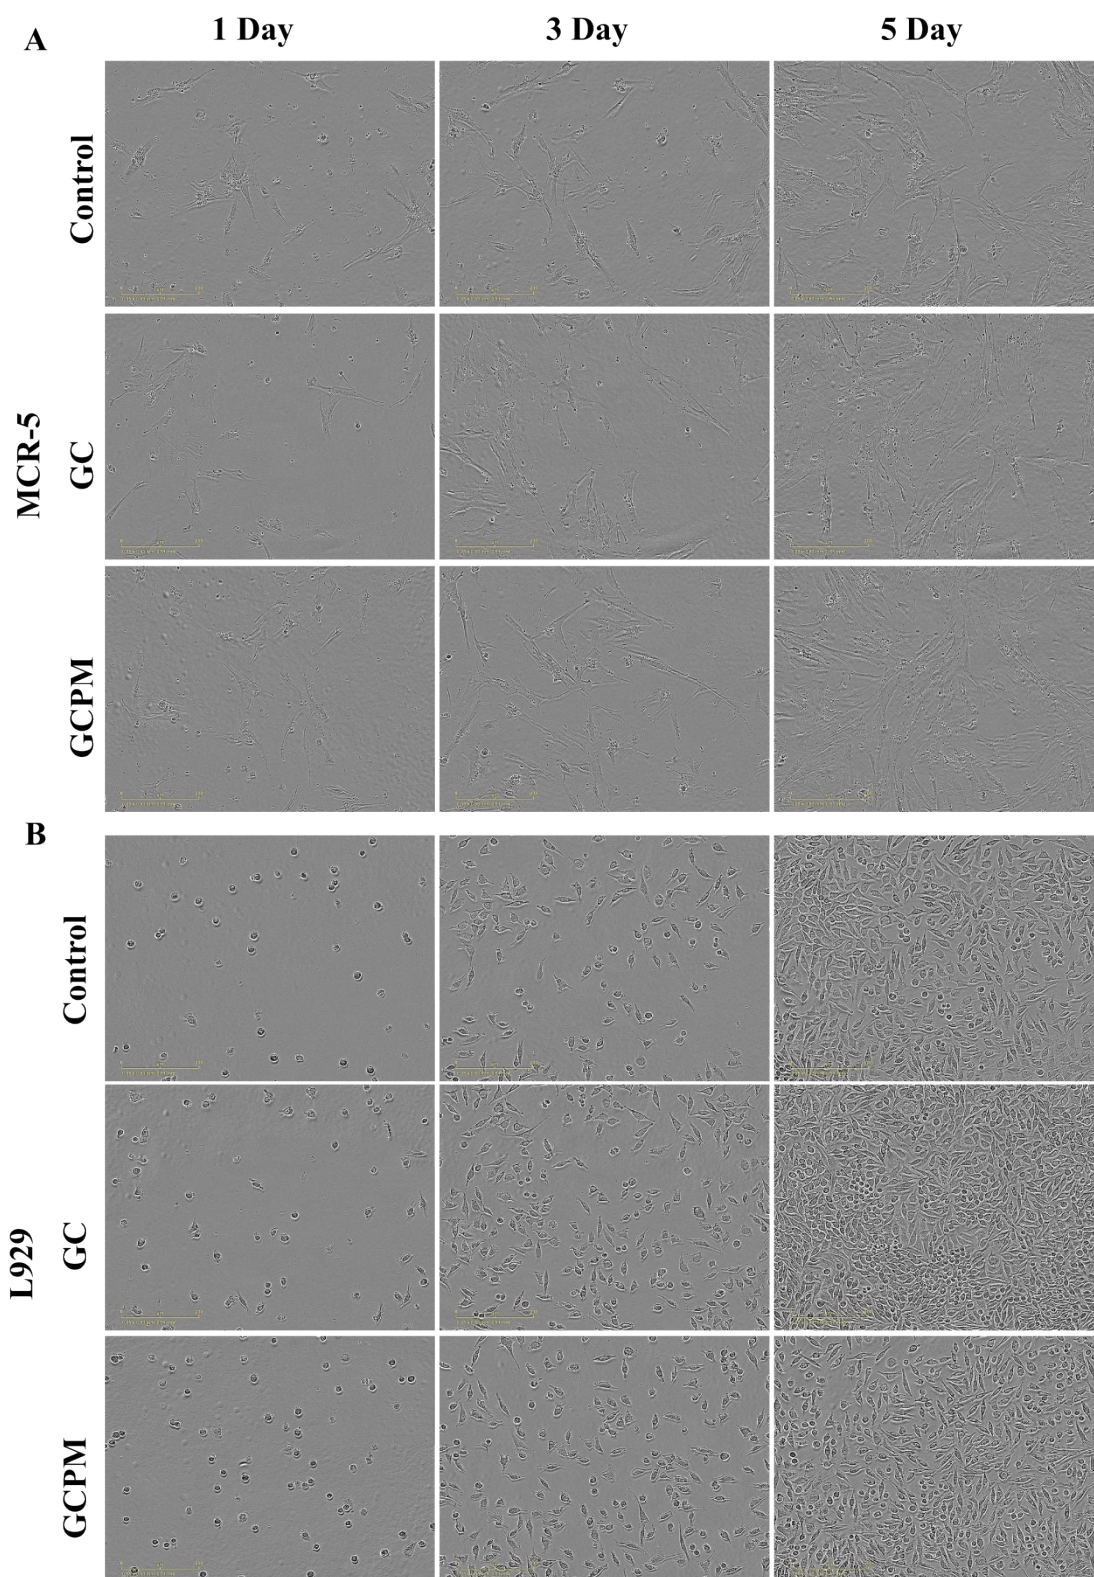

**Fig. S4.** L929 (A) and MRC-5 (B) cells morphology ncubated with GC and GCPM for 5 days. Scale bar: 200 mm.

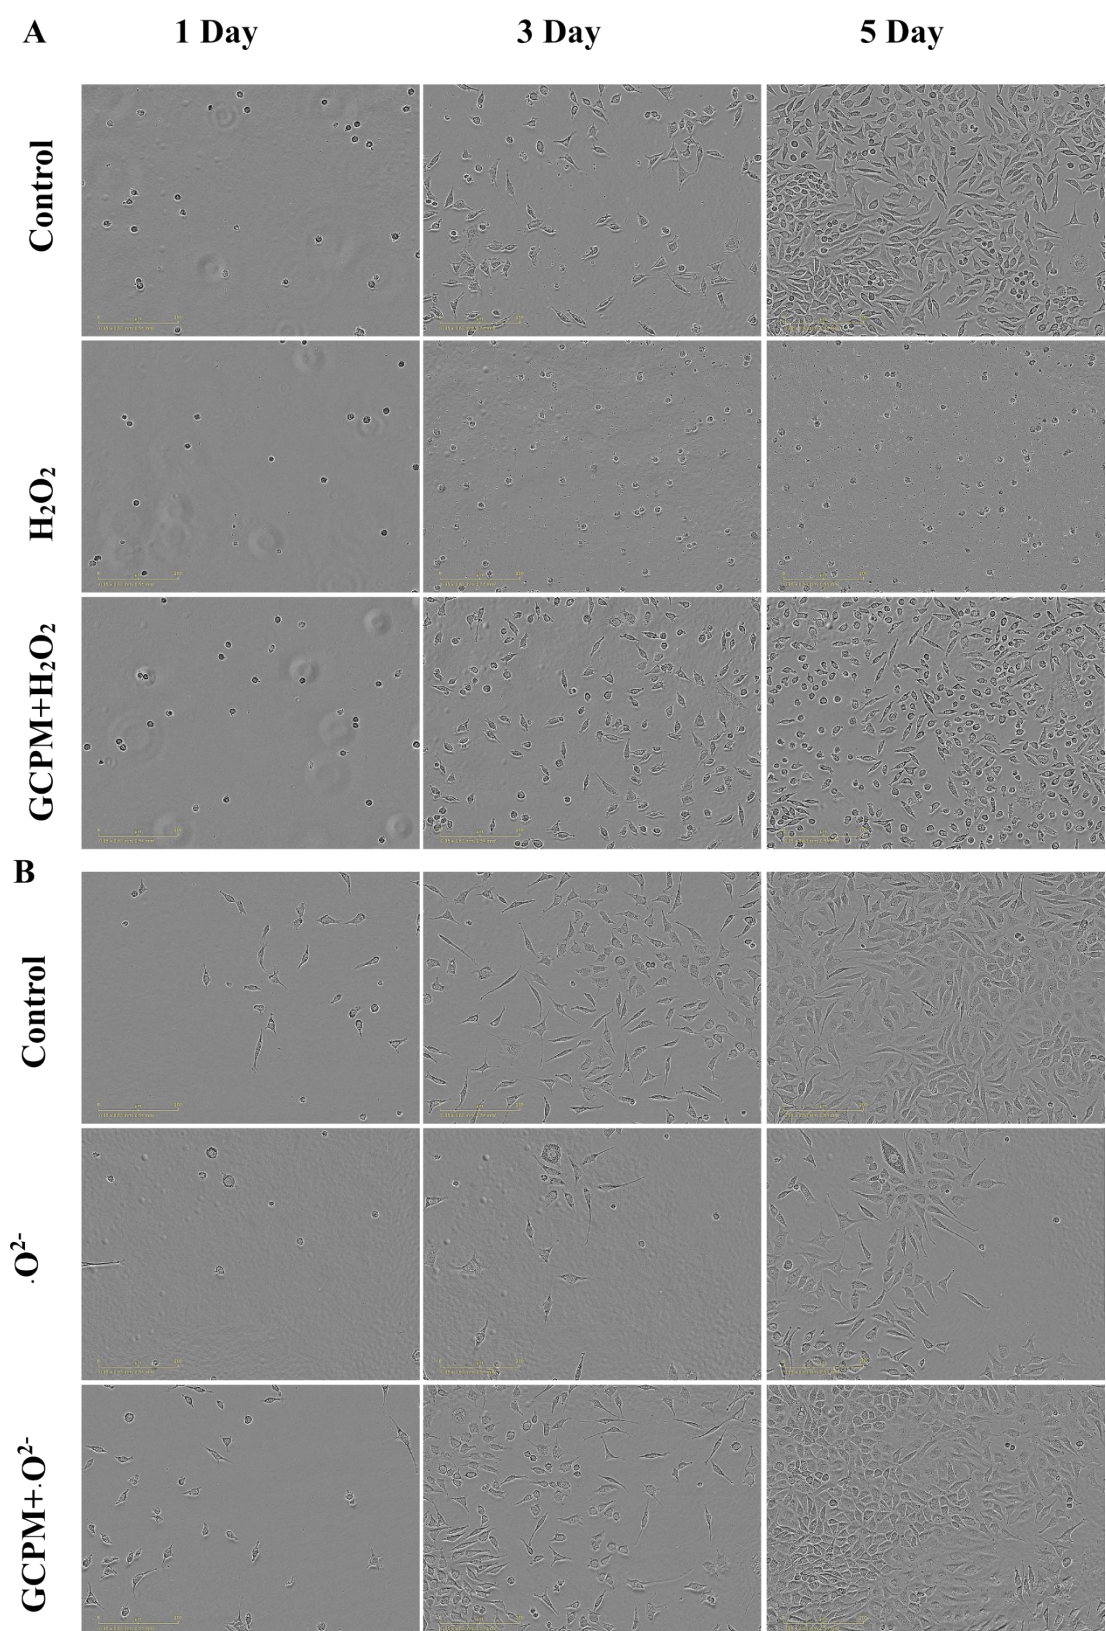

**Fig. S5.** L929 cells morphology following treatment with H<sub>2</sub>O<sub>2</sub> (A) and ·O<sub>2</sub><sup>-</sup> (B) catalyzed by GCPM for 5 days. Scale bar: 200 mm.

**Table S1.** The standard of cytotoxicity determined from RGR

| Cytotoxicity level | 0    | 1     | 2     | 3     | 4    | 5 |
|--------------------|------|-------|-------|-------|------|---|
| GRG (%)            | >100 | 75-99 | 50-74 | 25-49 | 1-24 | 0 |

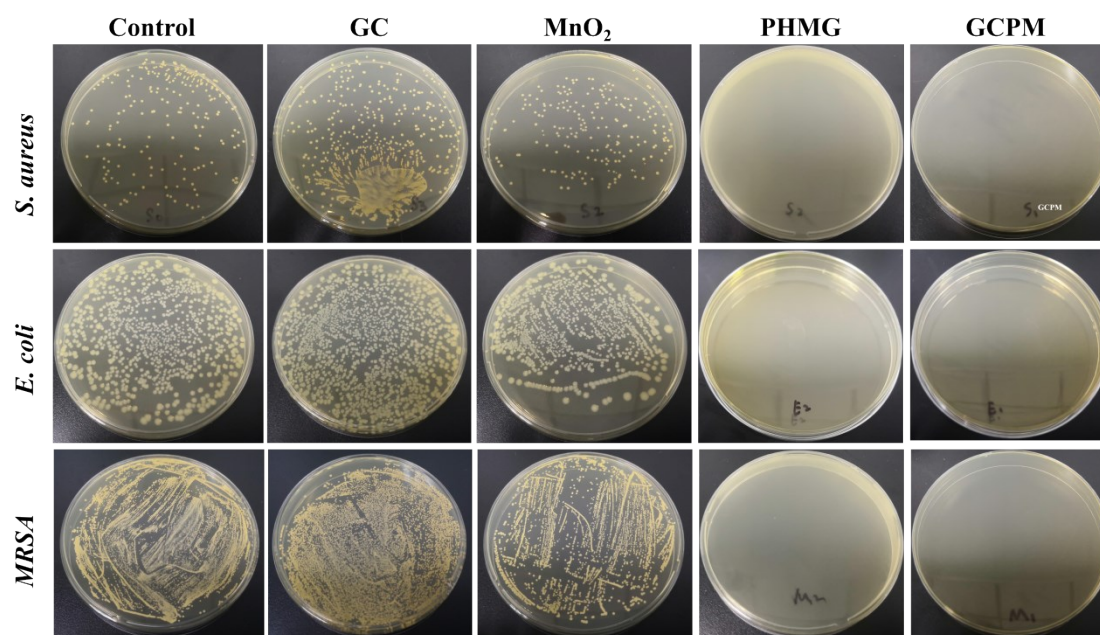

**Fig. S6.** The photographs showing the antibacterials activity of GC,  $MnO_2$  nanosheets, PHMG and GCPM against *S. aureus* and *E. coli* and *MRSA*.
